# Supplementary material for: Cancer-associated SF3B1 mutations affect alternative splicing by promoting alternative branchpoint usage
Source: PubMed Central journal article supplement (PMC4743009; doi:10.1038/ncomms10615), 2016-02-04
Supplement: ncomms10615-s1.pdf [file ncomms10615-s1.pdf]

A.

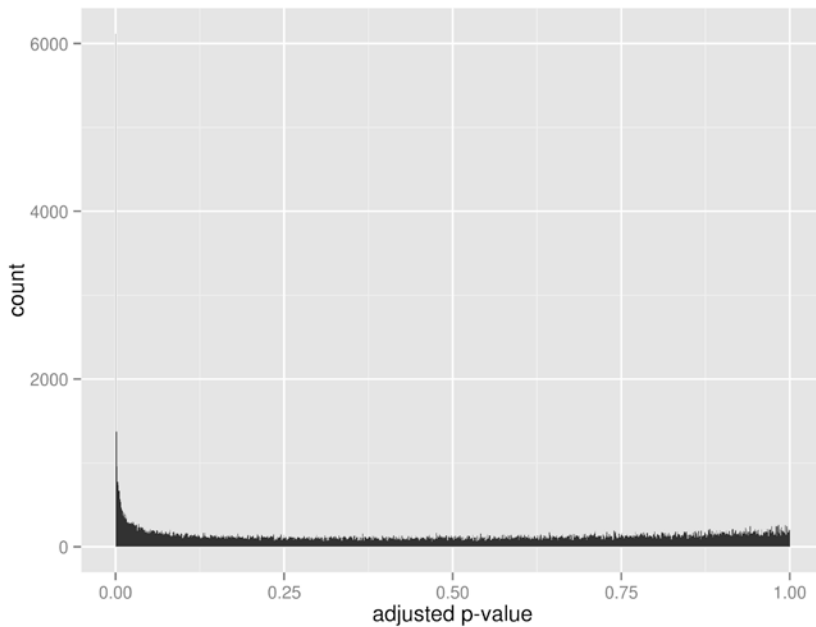

B.

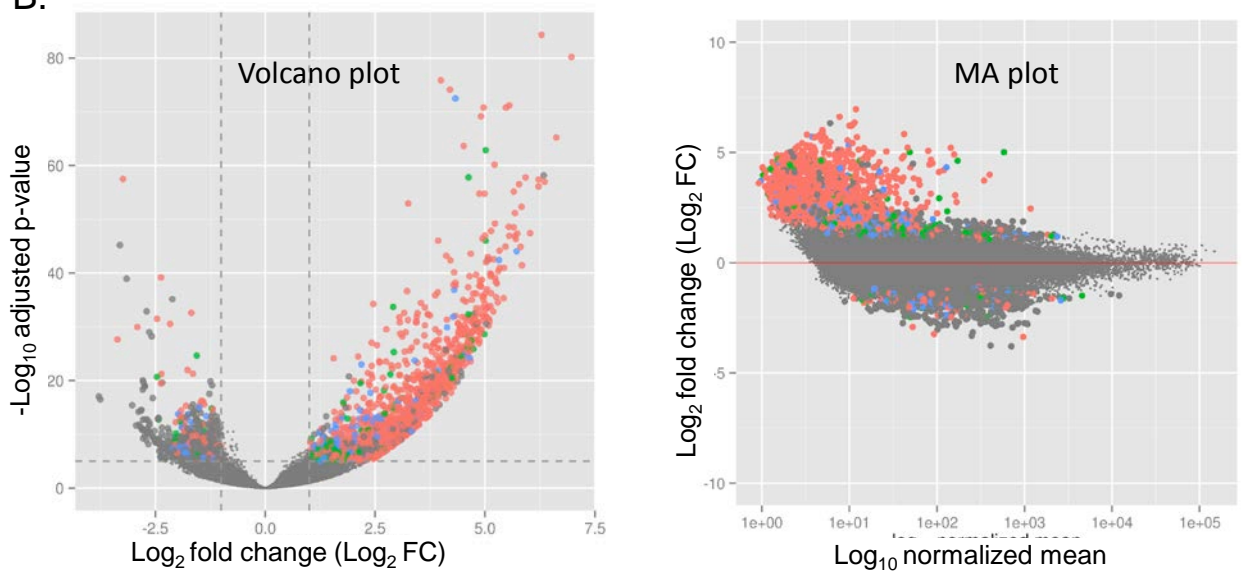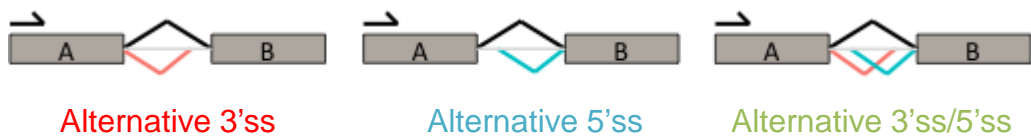

**Supplementary Figure 1. RNA-seq differential analysis of splice junctions between the *SF3B1*<sup>MUT</sup> and *SF3B1*<sup>WT</sup> uveal melanomas.**

A. Adjusted *P* value distribution by gene read in RNA-sequencing dataset. The *P* value density plots, stratified by read count quartiles, have a uniform distribution. *P* values are based on Wald test and Benjamini & Hochberg correction.

B. Volcano plot and MA plot analysis of differential splice junctions. For volcano plot, the logged ratio of splice variant expression between *SF3B1*-wild-type and *SF3B1*-mutant tumors is plotted on the x axis, and false discovery rate (FDR)-adjusted significance is plotted on the y axis ( $-\log_{10}$  scale). For MA plot, the logged ratio of splice variant expression is plotted on the y axis, while the the average log intensity is plotted on the x axis. Altered junctions were represented by different colors ; Red: alternative 3'ss; Blue: alternative 5'ss; green: alternative 3'ss/5'ss.

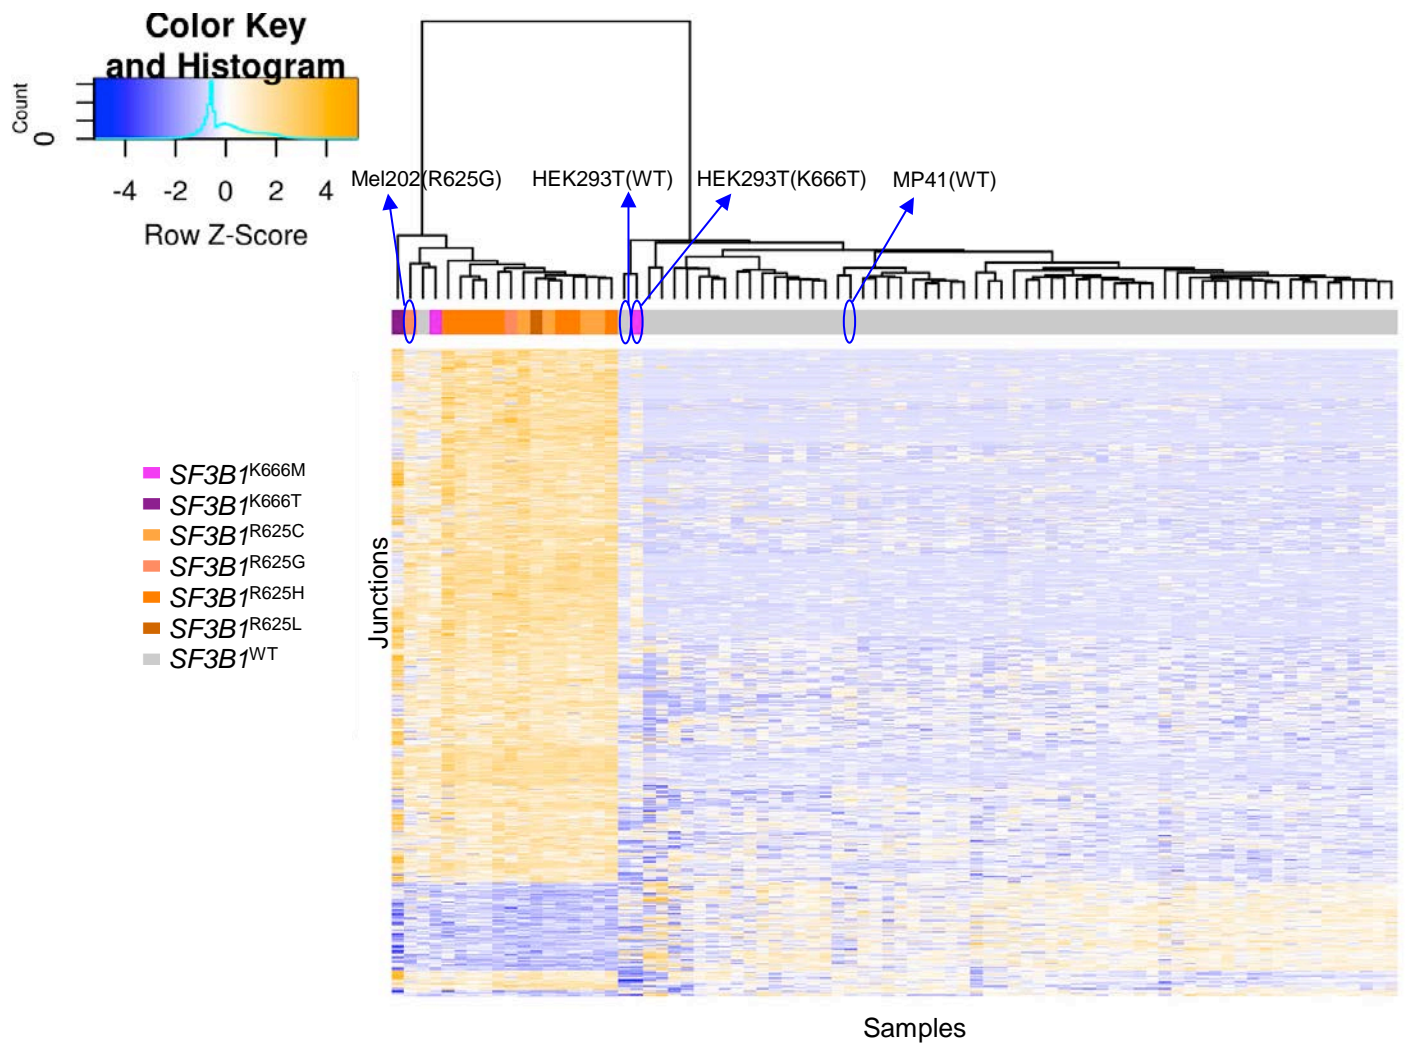

**Supplementary Figure 2. Hierarchical clustering and heatmap analysis of differential splice junctions in cell lines and tumor samples.**

The colors of squares below the tree denote the subtype of each sample. Below the array tree and the subtype identification row, the heatmap of the 1469 splice junctions is shown.

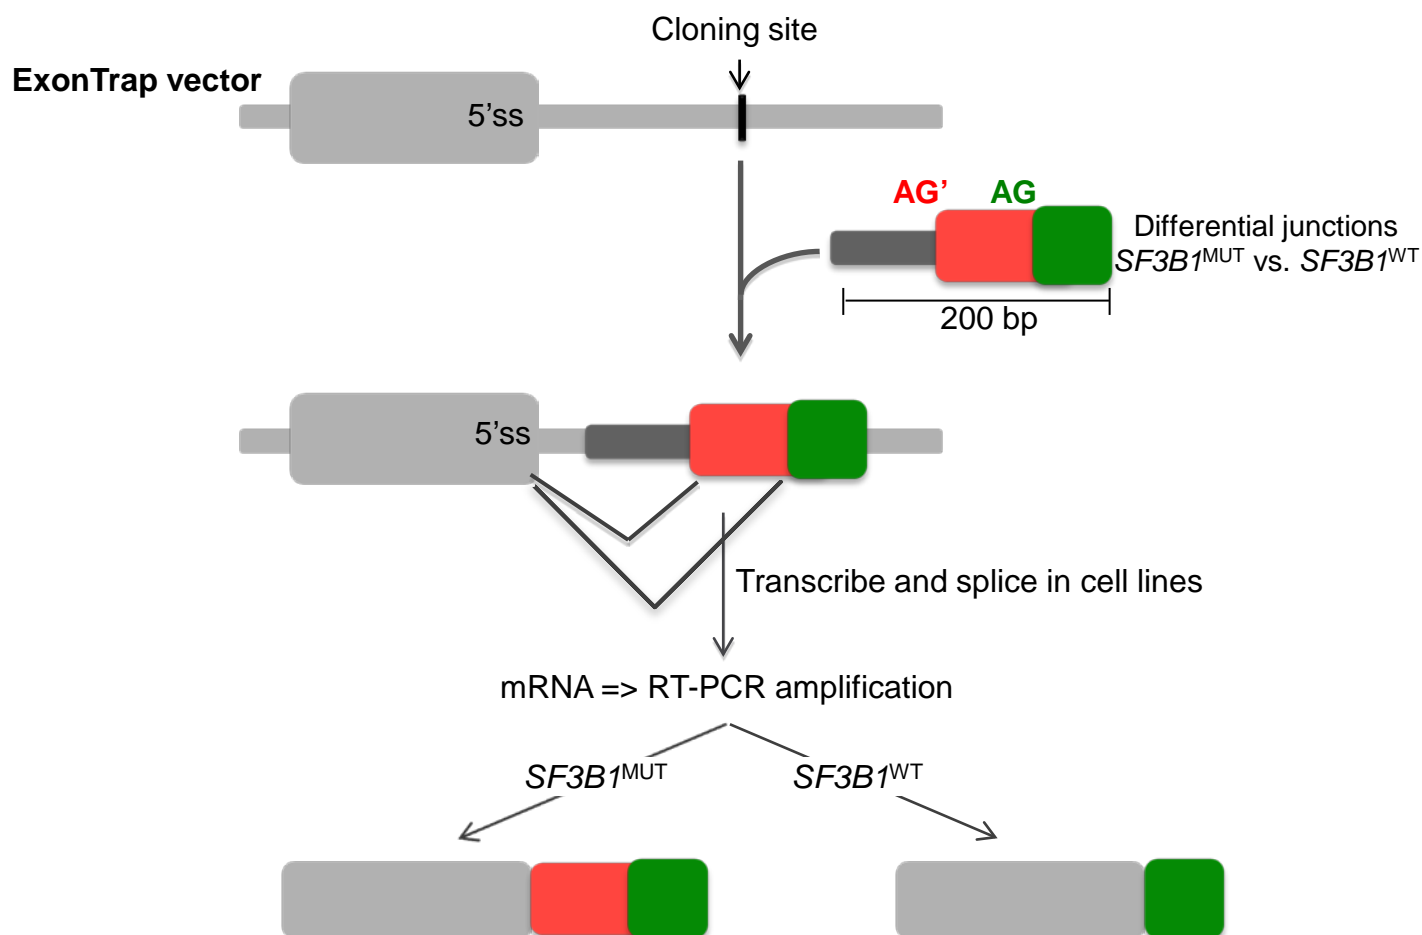

**Supplementary Figure 3. Schematic presentation of the minigene splice assay.**

The ExonTrap vector contains a functional 5' splice site (5'ss) and a multiple cloning site region. AG'-centered sequence of about 200 nucleotides sequences of top differential junctions were cloned in the cloning site. The constructs were then expressed in different cell lines. The different cell lines were transiently transfected with the minigene constructs and examined 48h later for the AG'/AG usage.

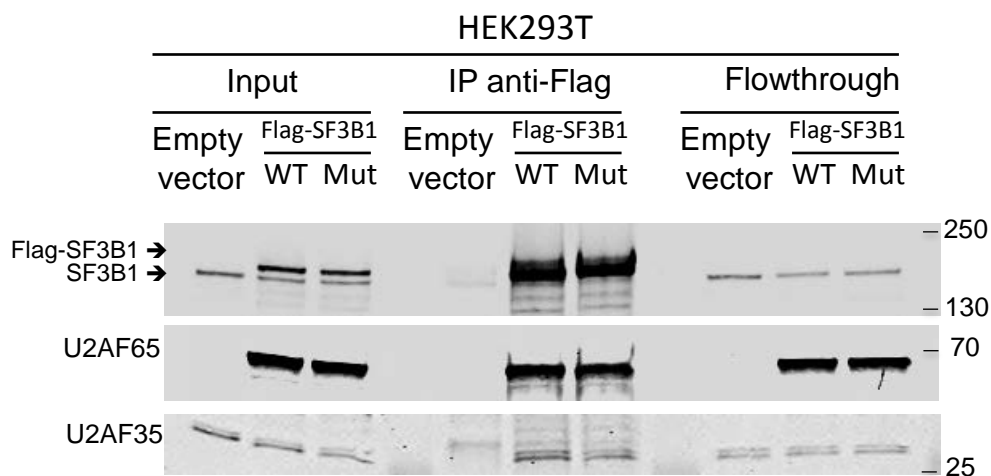

**Supplementary Figure 4. Co-immunoprecipitation of U2AF65/35 and wild-type or mutated SF3B1.**

HEK293T cells were co-transfected with pcDNA3.11.Myc-U2AF65 and either pCMV-3tag-1A-SF3B1<sup>WT</sup> or pCMV-3tag-1A-SF3B1<sup>K700M</sup>. After 48 hours, proteins immunoprecipitated by antiFlag gel affinity were separated by SDS-PAGE and probed in a Western blot assay with anti-Flag, anti-U2AF65 and anti-U2AF35 antibody. Molecular weight markers reported here are visible on over-exposed Supplementary Figure 8.

A.

***TMEM14C* Exontrap cassette**

//TGACTGCTGGAGAGCTGTGCTTTTAACTACCTCTGATCCAGCTTGTTTTCTGCAGGTGCAGGCCTG//  
BP' BP AG' AG

***TMEM14C*<sup>mut1</sup>**

TGACTGCTGGAGAGCTGTGCTTTTAACTAC**tacta**ACCAGCTTGTTTTCTGCAGGTGCAGGCCTG

***TMEM14C*<sup>mut2</sup>**

TGACTGCTGGAGAGCTGTGCTTTTAACTAC**tactt**ATCCAGCTTGTTTTCTGCAGGTGCAGGCCTG

***TMEM14C*<sup>mut3</sup>**

TGACTGCTGGAGAGCTGTGCTT**gct**ACTA**g**CTCTGATCCAGCTTGTTTTCTGCAGGTGCAGGCCTG

***TMEM14C*<sup>mut2+3</sup>**

TGACTGCTGGAGAGCTGTGCTT**gct**ACTA**gtactt**ATCCAGCTTGTTTTCTGCAGGTGCAGGCCTG

***TMEM14C*<sup>swap</sup>**

TGACTGCTGGAGAGCTGTGCT**tctg**AtAC**ttta**cACCAGCTTGTTTTCTGCAGGTGCAGGCCTG

B.

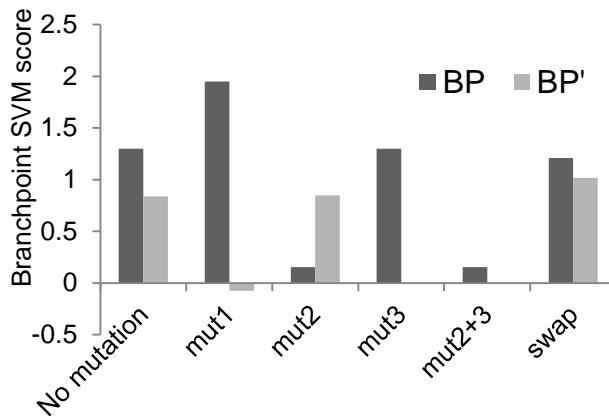

**Supplementary Figure 5. Base-pairing potential mutants of branchpoints of *TMEM14C*.** A. *TMEM14C* Sequences of site-directed mutagenesis of canonical (BP) and alternative (BP') branchpoints of *TMEM14C* ExonTrap constructs. B. Predicted SVM scores for the mutated branchpoints.

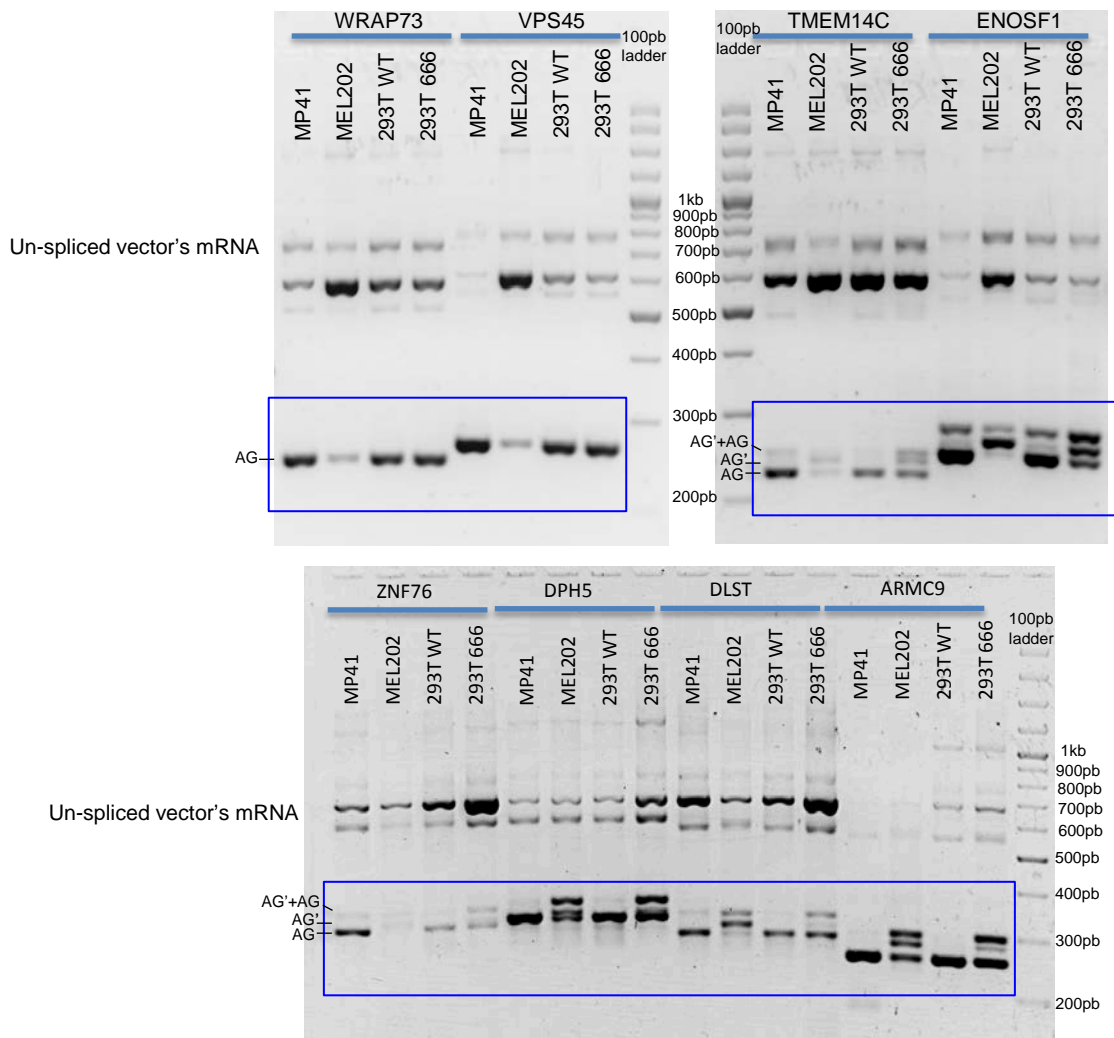

**Supplementary Figure 6.** Agarose gel full images of Figure 2A

***TMEM14C* Exontrap cassette**

***ENOSF1* Exontrap cassette**

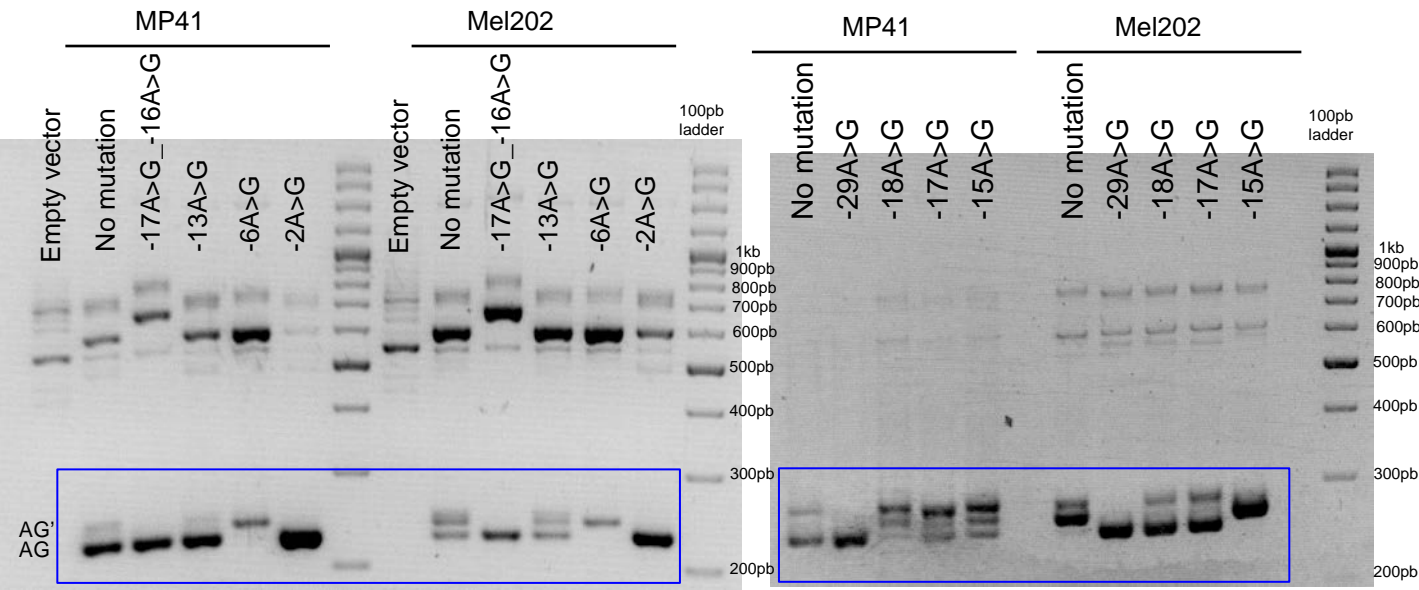

***TMEM14C* Exontrap cassette**

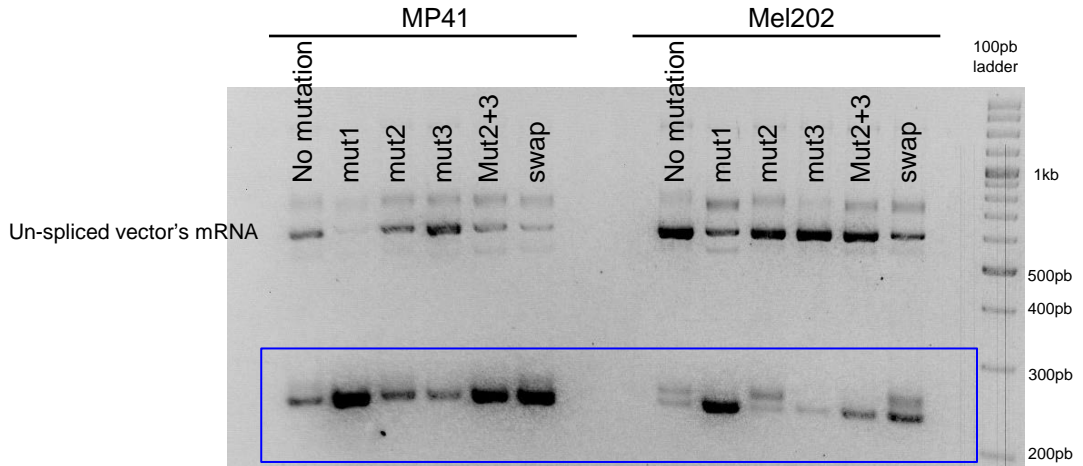

**Supplementary Figure 7.** Agarose gel full images of Figures 5B and 5C

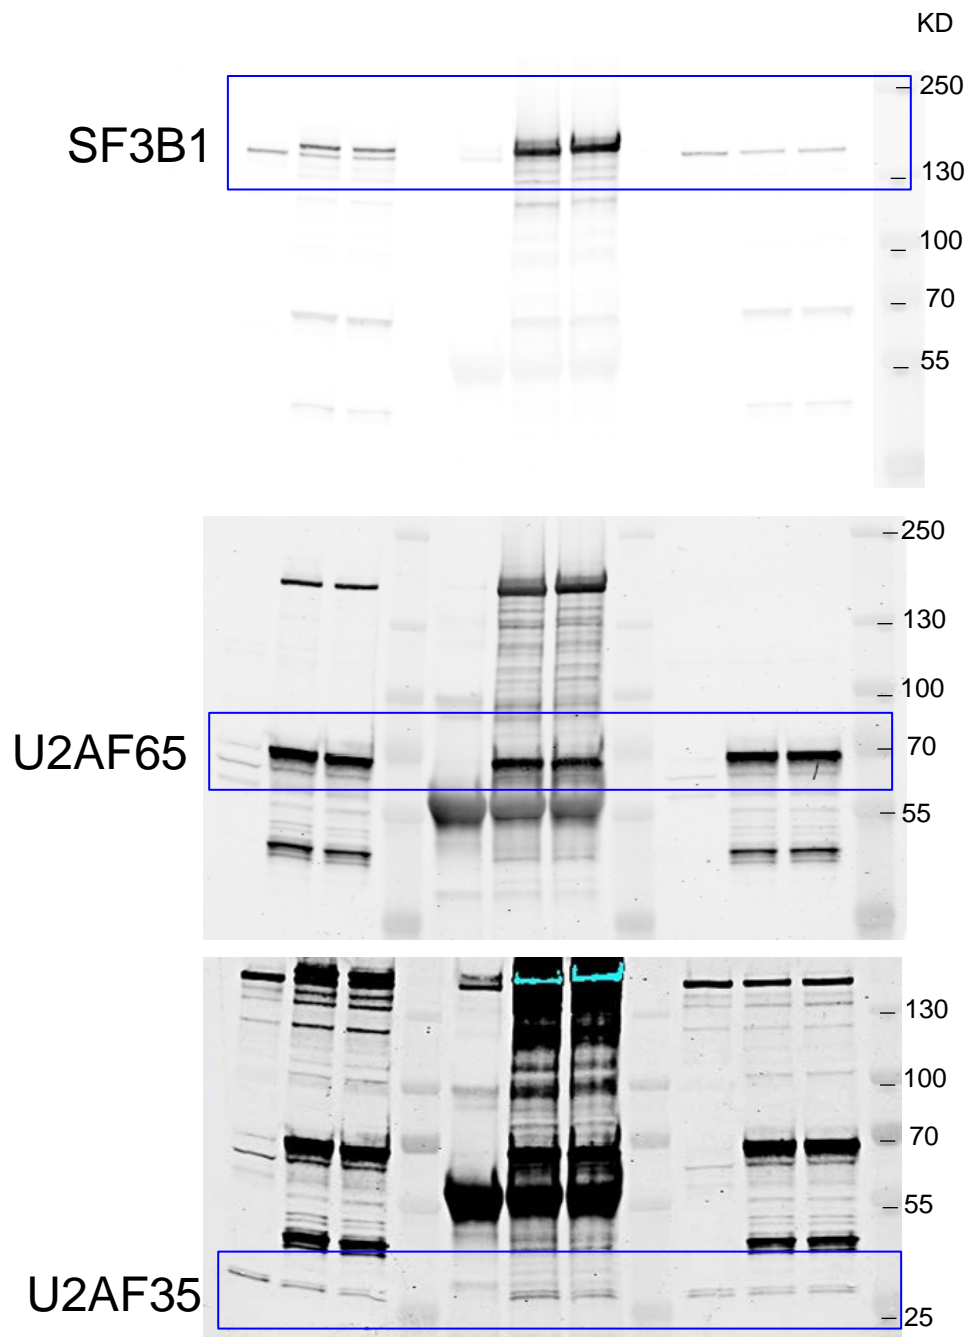

**Supplementary Figure 8.** immunoblotting row images of Supplementary Figure 4



**Supplementary Table 1. Clinical information of 74 patients analyzed by RNA-Seq.**

| Tumor # | LTD (mm) | Thickness (mm) | TNM | Metastasis | SF3B1 mutation | Histotype        | Follow-up (months) | Latest status |
|---------|----------|----------------|-----|------------|----------------|------------------|--------------------|---------------|
| 1       | 20       | 10             | T4  | No         |                | Spindle cell     | 95                 | NED           |
| 2       | 14       | 13.5           | T3  | No         |                | Epithelioid cell | 73                 | NED           |
| 3       | 15       | 12.9           | T3  | No         | p.K666M        | Mixed            | 91                 | NED           |
| 4       | 20       | 6.8            | T4  | Yes        |                | Epithelioid cell | 30                 | DFD           |
| 5       | 11       | 8.2            | T2  | No         |                | Epithelioid cell | 68                 | NED           |
| 6       | 10       | 12.7           | T3  | No         |                | Epithelioid cell | 60                 | NED           |
| 7       | 13       | 13.3           | T3  | No         | p.R625C        | Spindle cell     | 68                 | NED           |
| 8       | 17       | 16.7           | T4  | Yes        |                | Mixed            | 19                 | DFD           |
| 9       | 24       | 13.2           | T4  | No         |                | Spindle cell     | 69                 | NED           |
| 10      | 22       | 14.5           | T4  | Yes        | p.R625H        | Epithelioid cell | 54                 | DFD           |
| 11      | 18       | 14             | T4  | Yes        |                | Epithelioid cell | 19                 | DFD           |
| 12      | 22       | 14.8           | T4  | No         | p.R625H        | Mixed            | 31                 | DFD           |
| 13      | 16       | 12.1           | T4  | Yes        | p.R625H        | Mixed            | 89                 | AWD           |
| 14      | 15       | 11             | T3  | No         | p.R625G        | Mixed            | 61                 | NED           |
| 15      | 21       | 13.7           | T4  | Yes        |                | Epithelioid cell | 23                 | DFD           |
| 16      | 25       | 12.2           | T4  | No         | p.R625H        | Spindle cell     | 77                 | NED           |
| 17      | 12       | 10.2           | T3  | No         |                | Epithelioid cell | 30                 | DFO           |
| 18      | 18       | 11.7           | T4  | No         |                | Spindle cell     | 81                 | NED           |
| 19      | 16       | 13.5           | T4  | Yes        |                | Epithelioid cell | 31                 | DFD           |
| 21      | 22       | 10             | T4  | Yes        |                | Mixed            | 34                 | DFD           |
| 23      | 18       | 11             | T4  | No         | p.R625C        | Mixed            | 57                 | NED           |
| 24      | 20       | 15.5           | T4  | Yes        |                | Spindle cell     | 61                 | DFD           |
| 25      | 23       | 16             | T4  | No         |                | Mixed            | 40                 | NED           |
| 26      | 20       | 11.5           | T4  | Yes        |                | Mixed            | 19                 | DFD           |
| 27      | 20       | 11.5           | T4  | Yes        | p.R625C        | Spindle cell     | 30                 | DFD           |
| 28      | 19.5     | 12.6           | T4  | No         | p.R625L        | Spindle cell     | 71                 | NED           |
| 29      | 20       | 8.8            | T4  | No         |                | Epithelioid cell | 6                  | DFO           |
| 30      | 21       | 11.2           | T4  | Yes        |                | Epithelioid cell | 19                 | DFD           |
| 31      | 18       | 6.7            | T4  | No         | p.R625H        | Mixed            | 51                 | NED           |
| 32      | 22       | 13             | T4  | Yes        |                | Mixed            | 9                  | DFD           |
| 33      | 14       | 11.3           | T3  | Yes        |                | Mixed            | 94                 | AWD           |
| 34      | 15       | 14             | T3  | Yes        |                | Mixed            | 44                 | DFD           |
| 35      | 19       | 12.8           | T4  | Yes        |                | Epithelioid cell | 42                 | DFD           |
| 36      | 19       | 12.8           | T4  | No         |                | Spindle cell     | 18                 | DFO           |
| 37      | 21       | 9.7            | T4  | No         |                | Epithelioid cell | 67                 | NED           |
| 38      | 16       | 11.1           | T3  | No         |                | Epithelioid cell | 55                 | NED           |
| 39      | 18       | 12.7           | T4  | No         | p.R625H        | Epithelioid cell | 2                  | DFO           |
| 40      | 17       | 12             | T3  | No         |                | Epithelioid cell | 86                 | NED           |
| 41      | 18       | 8.3            | T4  | Yes        |                | Mixed            | 49                 | DFD           |
| 42      | 20       | 8.6            | T4  | Yes        |                | Mixed            | 20                 | DFD           |
| 43      | 14       | 14.7           | T3  | Yes        |                | Mixed            | 50                 | DFD           |
| 44      | 22       | 9.1            | T4  | Yes        |                | Mixed            | 29                 | DFD           |
| 45      | 25       | 13.7           | T4  | Yes        |                | Mixed            | 24                 | DFD           |
| 46      | 20       | 12             | T4  | Yes        |                | Mixed            | 13                 | DFD           |
| 47      | 23       | 12.5           | T4  | Yes        |                | Epithelioid cell | 27                 | DFD           |
| 48      | 19       | 14.8           | T4  | Yes        |                | Mixed            | 39                 | DFD           |
| 49      | 16       | 16             | T4  | No         | p.R625H        | Mixed            | 63                 | DFO           |
| 50      | 18       | 12             | T4  | No         |                | Mixed            | 74                 | NED           |
| 51      | 22       | 13.9           | T4  | No         |                | Mixed            | 62                 | NED           |
| 52      | 26       | 14.8           | T4  | No         |                | Mixed            | 13                 | DFO           |
| 53      | 18       | 12.6           | T4  | No         | p.R625H        | Spindle cell     | 14                 | NED           |
| 54      | 12       | 7.1            | T2  | No         |                | Spindle cell     | 66                 | NED           |
| 55      | 22       | 12.4           | T4  | Yes        |                | Spindle cell     | 17                 | DFD           |
| 56      | 20       | 12.5           | T4  | Yes        |                | Spindle cell     | 67                 | DFD           |
| 57      | 19       | 16             | T4  | Yes        |                | Mixed            | 60                 | DFD           |
| 58      | 15.5     | 9.8            | T3  | No         |                | Spindle cell     | 32                 | NED           |
| 59      | 22       | 10.2           | T4  | Yes        |                | Mixed            | 30                 | DFD           |
| 60      | 20       | 13.1           | T4  | No         | p.K666T        | Spindle cell     | 62                 | NED           |
| 61      | 16       | 12.5           | T4  | Yes        |                | Epithelioid cell | 17                 | DFD           |
| 62      | 15       | 11.6           | T3  | Yes        |                | Mixed            | 29                 | DFD           |
| 63      | 18.6     | 12.4           | T4  | Yes        | p.R625C        | Mixed            | 44                 | DFD           |
| 64      | 18.6     | 14.8           | T4  | Yes        |                | Mixed            | 28                 | NED           |
| 65      | 20       | ND             | T4  | No         |                | Mixed            | 61                 | NED           |
| 66      | 16       | 8              | T3  | No         |                | Spindle cell     | 45                 | NED           |
| 67      | 16       | 12.5           | T4  | No         |                | Spindle cell     | 74                 | NED           |
| 68      | 17       | 13.5           | T4  | Yes        |                | Spindle cell     | 85                 | AWD           |
| 69      | 24       | 9.1            | T4  | No         |                | Mixed            | 63                 | NED           |
| 70      | 16       | 12.6           | T4  | Yes        |                | Mixed            | 23                 | DFD           |
| 71      | 21       | 10.6           | T4  | No         |                | Epithelioid cell | 76                 | NED           |
| 72      | 15       | 12.7           | T3  | Yes        |                | Epithelioid cell | 52                 | DFD           |
| 73      | 20       | 9.1            | T4  | Yes        |                | Mixed            | 79                 | AWD           |
| 74      | 20       | 11.2           | T4  | Yes        |                | Epithelioid cell | 25                 | DFD           |
| 75      | 14.5     | 11.7           | T3  | Yes        |                | Mixed            | 48                 | DFD           |
| 76      | 13.5     | 11.6           | T3  | No         |                | Mixed            | 45                 | NED           |

LTD, Largest tumoral diameter; TNM, stage of disease; AWD, alive with disease; NED, no evidence of disease; DFD, dead from disease; DFO, dead from other cause.

**Supplementary Table 2. Primer sequences used for minigene ExonTrap constructs.**

| minigene      | primer sens | sequence 5' 3'                        |
|---------------|-------------|---------------------------------------|
| Cntl_WRAP73_F | Forward     | GCAGCCCGGGGGATCTCCTGGCGACGGGGGTGT     |
| Cntl_WRAP73_R | Reverse     | TAGAACTAGTGGATCCTGTACGTGGACAACAACC    |
| Cntl_VPS45_F  | Forward     | GCAGCCCGGGGGATCTTGCAGCAGAAATTATCTCC   |
| Cntl_VPS45_R  | Reverse     | TAGAACTAGTGGATCAGCCACAACCTTCCTGTTCA   |
| TMEM14C_F     | Forward     | GCAGCCCGGGGGATCCAGGTTGGACACACTTCTTTC  |
| TMEM14C_R     | Reverse     | TAGAACTAGTGGATCTGTCCAGACAGGAGACTACCC  |
| ENOSF1_F      | Forward     | GCAGCCCGGGGGATCCAGCCCTGCTGTGAGGTT     |
| ENOSF1_R      | Reverse     | TAGAACTAGTGGATCAGCTTGGACATCCACTCCAC   |
| ZNF76_F       | Forward     | GCAGCCCGGGGGATCGCCTGTTGGGTCTTAAGCTG   |
| ZNF76_R       | Reverse     | TAGAACTAGTGGATCTTAAGTGATGAGCGGTGGTG   |
| DPH5_F        | Forward     | GCAGCCCGGGGGATCCCTGGGAGAGCTAATTGCAT   |
| DPH5_R        | Reverse     | TAGAACTAGTGGATCTGAGAGCCCTTCTAGTGTCTTG |
| DLST_F        | Forward     | GCAGCCCGGGGGATCGCCCTGTAGGAAAGGGTTCT   |
| DLST_R        | Reverse     | TAGAACTAGTGGATCAAGCCCATGAAAAGCTGGTA   |
| CHTF18_F      | Forward     | GCAGCCCGGGGGATCGATGGGGCCTCTGAGTGTC    |
| CHTF18_R      | Reverse     | TAGAACTAGTGGATCGGACACGGTAGAATCGCTGT   |
| ARMC9_F       | Forward     | GCAGCCCGGGGGATCTGACATGATCCTTCCTCATT   |
| ARMC9_R       | Reverse     | TAGAACTAGTGGATCCCCTCCACTGCACATTAG     |
| FAMExTrap_F   | Forward     | FAM-GAGGGATCCGCTTCCTGCCCC             |

**Supplementary Table 3. The primer sequences used to generate mutations.**

| Gene              | Primer                         | Sense                                                            | sequence 5' 3'                                                           |
|-------------------|--------------------------------|------------------------------------------------------------------|--------------------------------------------------------------------------|
| ENOSF1            | -29 (c.805-29A>G)              | Forward                                                          | tgaggttgctcagggctggcctccctgtgaagagtctc                                   |
|                   | -29 (c.805-29A>G)              | Reverse                                                          | gagactctcacagggaggccagccctgagccaacctca                                   |
|                   | -16 (c.805-16A>G)              | Forward                                                          | ggctgacctccctgtggagagtctcttttgca                                         |
|                   | -16 (c.805-16A>G)              | Reverse                                                          | tgcaaaaagagactctccacagggagggtcagcc                                       |
|                   | -17 (c.805-17A>G)              | Forward                                                          | gctgacctccctgtgaggagtctcttttgag                                          |
|                   | -17 (c.805-17A>G)              | Reverse                                                          | ctgcaaaaagagactcctcacagggagggtcagc                                       |
|                   | -15 (c.805-15A>G)              | Forward                                                          | tgacctccctgtgaagggtctcttttgagatg                                         |
| -15 (c.805-15A>G) | Reverse                        | catctgcaaaaagagacctccacagggagggtca                               |                                                                          |
| TMEM14C           | -17_16 (c.-58-17A>G_-58-16A>G) | Forward                                                          | ctgctggagagctgtgcttttgctacctctgatccag                                    |
|                   | -17_16 (c.-58-17A>G_-58-16A>G) | Reverse                                                          | ctggatcagaggtagccaaaagcacagctctccagcag                                   |
|                   | -13 (c.-58-13A>G)              | Forward                                                          | gctggagagctgtgcttttaactgcctctgatccag                                     |
|                   | -13 (c.-58-13A>G)              | Reverse                                                          | ctggatcagaggtagttaaaagcacagctctccagc                                     |
|                   | -6 (c.-58-6A>G)                | Forward                                                          | gtgcttttaactacctctgtgctcagctgttttctgag                                   |
|                   | -6 (c.-58-6A>G)                | Reverse                                                          | ctgcagaaaaaacagctggaccagaggtagttaaaagcac                                 |
|                   | -2 (c.-58-2A>G)                | Forward                                                          | tttaactacctctgatccggctgttttctgaggtg                                      |
|                   | -2 (c.-58-2A>G)                | Reverse                                                          | cacctgcagaaaaaacagccggatcagaggtagttaaa                                   |
|                   | mut1                           | Forward                                                          | ggagagctgtgcttttaactactactaaccagctgttttctgaggtg                          |
|                   | mut1                           | Reverse                                                          | cacctgcagaaaaaacagctgggttagtagttagttaaaagcacagctctcc                     |
|                   | mut2                           | Forward                                                          | tggagagctgtgcttttaactactactatccagctgttttctgag                            |
|                   | mut2                           | Reverse                                                          | ctgcagaaaaaacagctggataagtagttagttaaaagcacagctctcca                       |
|                   | mut3                           | Forward                                                          | ctgactgctggagagctgtgcttactactagctctgatccagctgttttctg                     |
|                   | mut3                           | Reverse                                                          | cagaaaaaacagctggatcagagctagtagcaagcacagctctccagcagtcag                   |
|                   | mut2+3                         | Forward                                                          | tctttctgactgctggagagctgtgcttactactagtagttagcaagcacagctctccagcagtcagaaaga |
|                   | mut2+3                         | Reverse                                                          | ctgcacctgcagaaaaaacagctggataagtagtagcaagcacagctctccagcagtcagaaaga        |
|                   | swap                           | Forward                                                          | ctttctgactgctggagagctgtgcttctgattaccttaaccagctgttttctgaggtgc             |
| swap              | Reverse                        | gcacctgcagaaaaaacagctgggttaagglaatcagaagcacagctctccagcagtcagaaag |                                                                          |
